# Supplementary material for: Ce and P123 modified layered double hydroxide (LDH) composite for the synthesis of polypropylene glycol monomethyl ether
Source: Royal Society of Chemistry journal article supplement (doi:10.1039/d2ra03716e), 2022-01-01
Supplement: d2ra03716e1.pdf [file d2ra03716e1.pdf]

## Supporting Information

### Ce and P123 modified layered double hydroxide (LDH) composite for the synthesis of polypropylene glycol monomethyl ether

Xiaoyan Cao,<sup>a, b</sup> Lingxin Kong,<sup>a, b</sup> Zhenggui Gu,<sup>a, b\*</sup> Xiao Xu,<sup>a\*</sup>

<sup>a</sup> School of Chemistry and Materials Science, Nanjing Normal University, Nanjing 210023, China;

<sup>b</sup> Jiangsu Provincial Key Laboratory of Materials Cycling and Pollution Control, Nanjing Normal University, Nanjing 210023, China;

\*Corresponding authors. Email: 07160@njnu.edu.cn (ZG. G.); 211102103@njnu.edu.cn (X. X.)

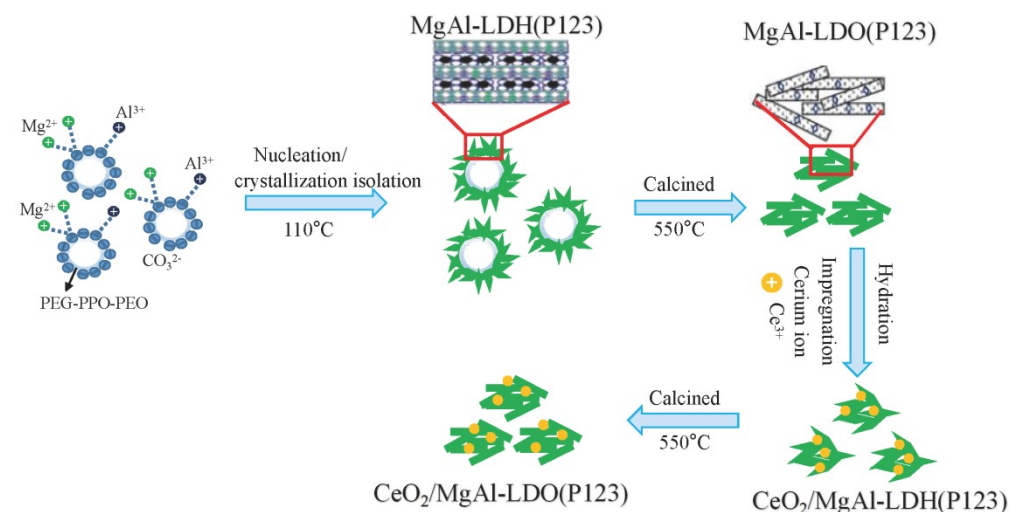

Fig. S1 Mechanism diagram for CeO<sub>2</sub>/MgAl-LDO(P123) formation.

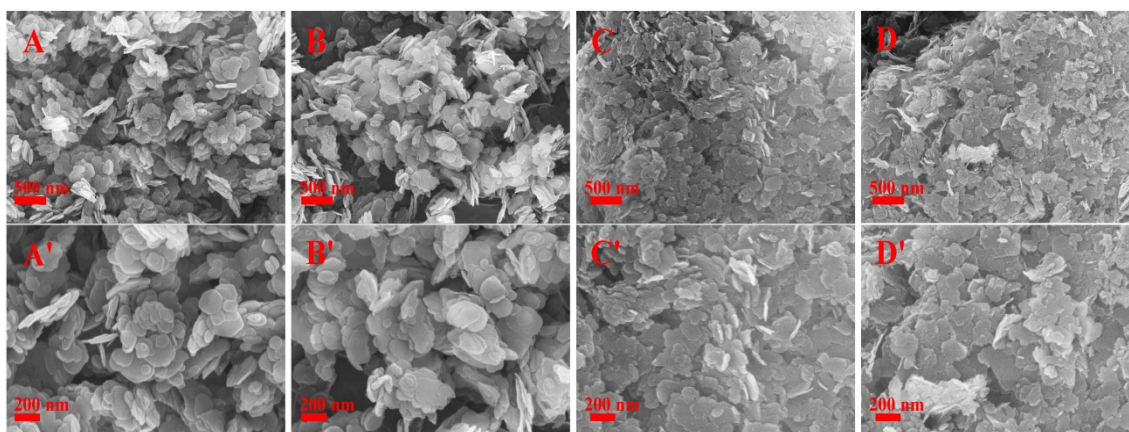

Fig. S2 Different magnification SEM images of as-prepared materials: MgAl-LDH(P123) (A, A'), MgAl-LDO(P123) (B, B'), CeO<sub>2</sub>/MgAl-LDH(P123) (C, C') and CeO<sub>2</sub>/MgAl-LDO(P123) (D, D').

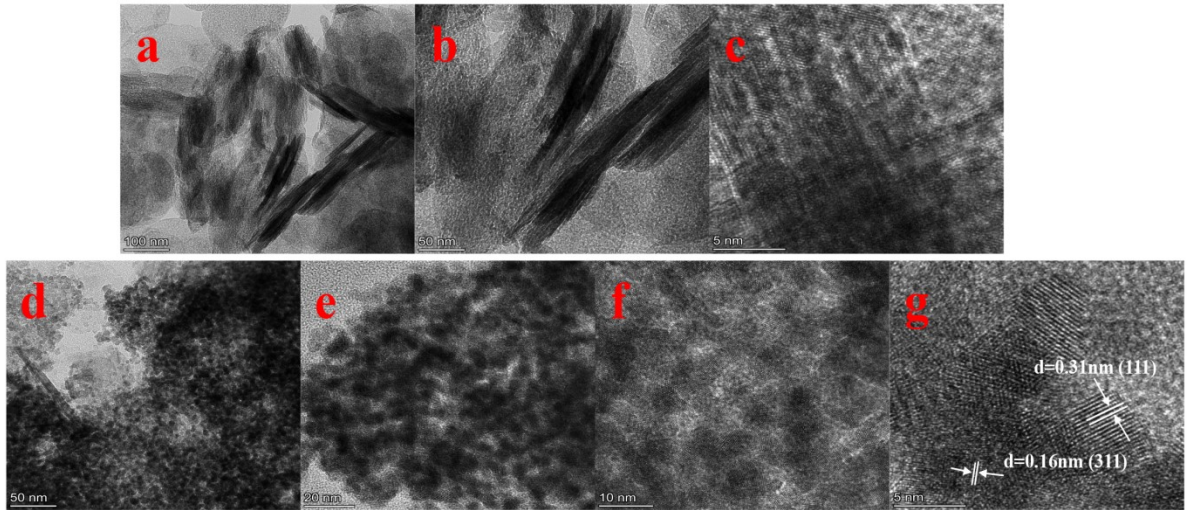

**Fig. S3** Different magnification TEM images of as-prepared materials: MgAl-LDO(P123) (a, b, c), and CeO<sub>2</sub>/MgAl-LDO (P123) (d, e, f, g).

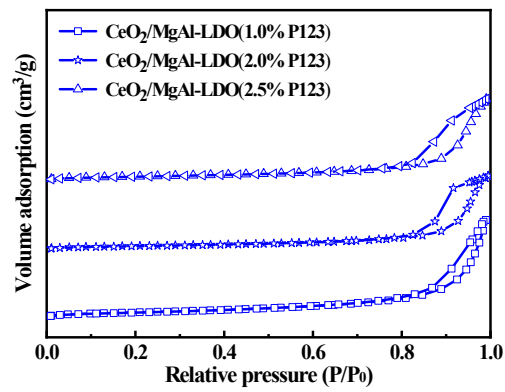

**Fig. S4** N<sub>2</sub> adsorption-desorption isotherms of as-prepared materials.
